# Supplementary material
Source: PubMed Central journal article supplement (PMC4338833)
Supplement: ncomms5741-s1.pdf [file ncomms5741-s1.pdf]

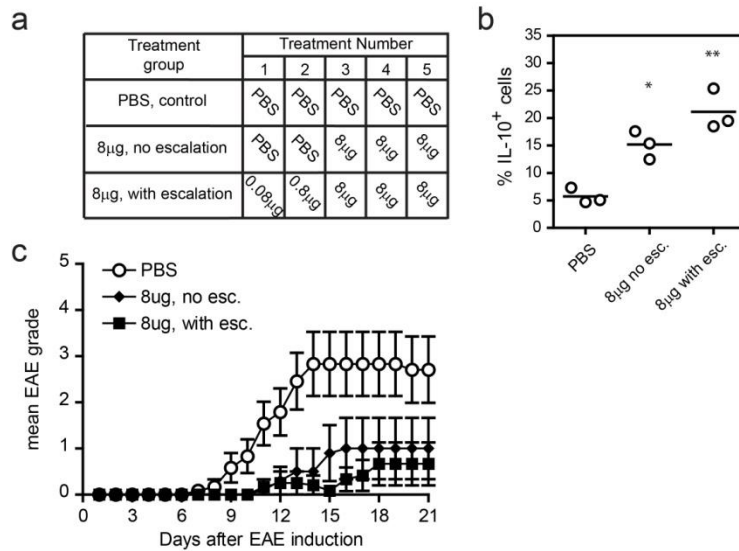

**Supplementary Fig. 1 Dose escalation enhances the induction of IL-10<sup>+</sup> CD4<sup>+</sup> T cells in addition to minimising the risk of adverse effects during immunotherapy.** Tg4 mice were treated s.c. with 3x8 $\mu$ g doses of MBP Ac1-9[4Y], with or without prior dose escalation, as illustrated (a). Splenocytes were cultured for five days with 10 $\mu$ g ml<sup>-1</sup> MBP Ac1-9[4K] and 20U ml<sup>-1</sup> IL-2. (b) Scatter plots show the percentage of viable CD4<sup>+</sup> cells which are IL-10<sup>+</sup>, horizontal lines show means for each column ( $n=3$ ). One of two experiments. \*  $P \leq 0.05$ , \*\*  $P \leq 0.01$  one-way ANOVA with Bonferroni post-test, comparing peptide-treated groups with PBS-treated control group. (c) Onset and severity of EAE in mice treated as illustrated in (a), immunised with MBP Ac1-9[4K]/CFA and pertussis toxin. Results of two independent experiments are pooled, showing mean disease score  $\pm$  SEM (PBS group and 8 $\mu$ g, with escalation, both  $n=12$ . 8 $\mu$ g, no escalation  $n=10$ ).

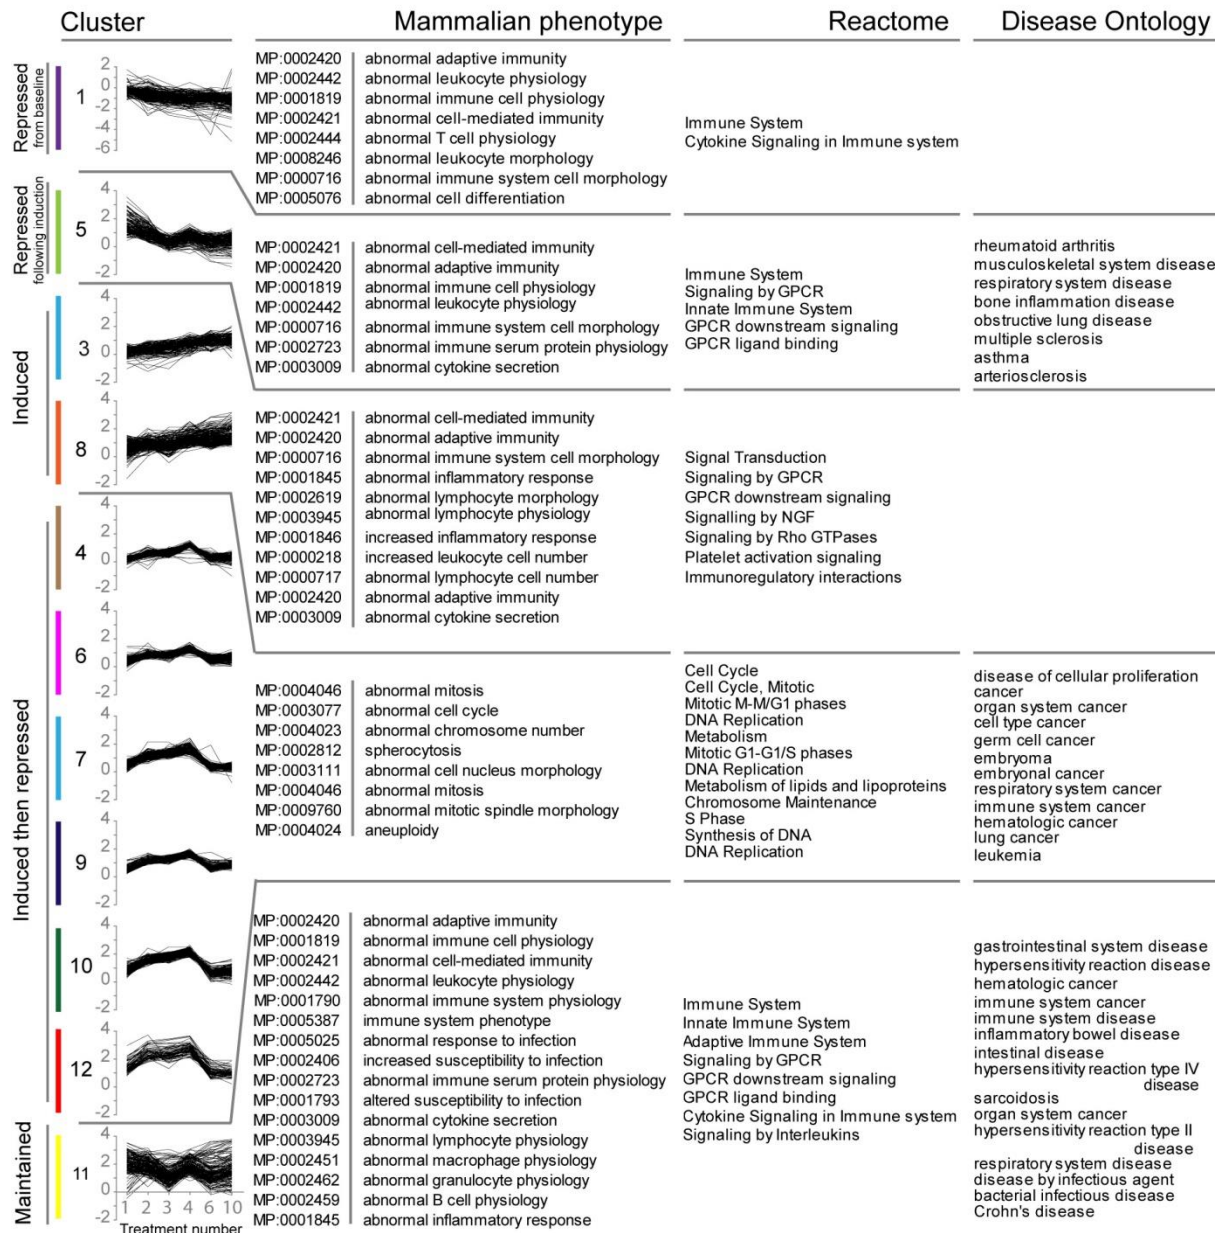

**Supplementary Fig. 2 Ontology terms enriched in clusters of co-regulated CD4<sup>+</sup> T cell genes during dose escalation immunotherapy.** Tg4 Rag-1<sup>-/-</sup> mice were EDI-treated s.c. with MBP Ac1-9[4Y]. CD4<sup>+</sup> T cell transcriptome analysis was undertaken at the indicated treatment stages and transcripts were grouped by two-phase SOM clustering (see Fig. 6). Expression pattern and amplitude of expression of transcripts assigned to the twelve color-coded gene clusters described in Fig. 6b are here represented by line profiles. Significantly enriched, immunologically relevant annotations from Mammalian Phenotype, Reactome and Disease Ontology databases are shown (FDR <10<sup>-5</sup> for MP, <5x10<sup>-2</sup> for Reactome and DO). Where no terms are shown, no immunologically relevant terms were enriched.

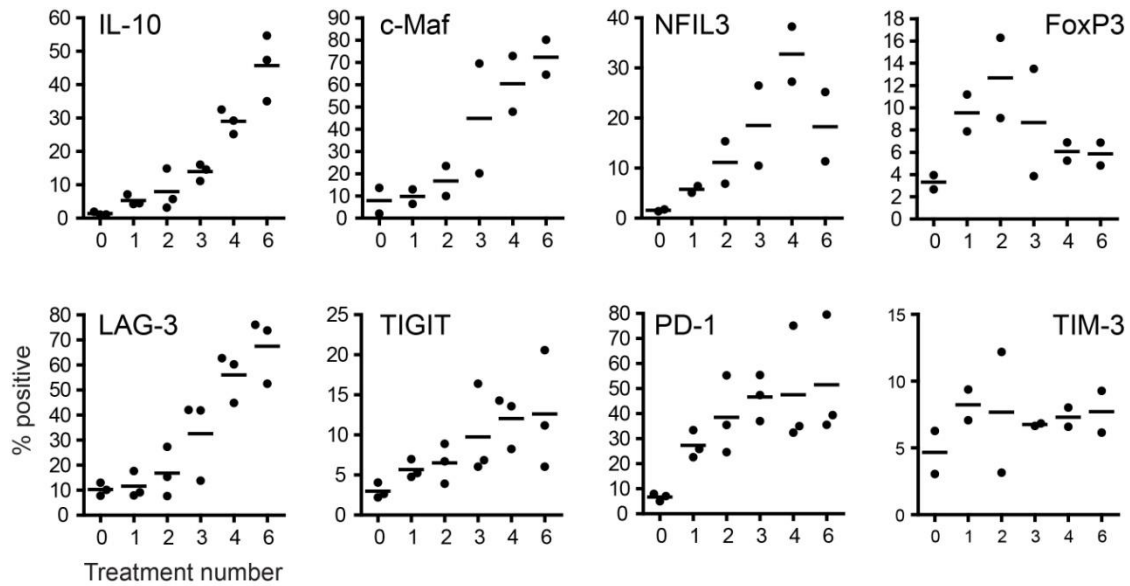

**Supplementary Fig. 3 CD4<sup>+</sup> T cell signature induced by dose escalation**

**immunotherapy.** Tg4 mice were treated s.c. with an escalating dose of MBP Ac1-9[4Y] (0.08 $\mu$ g  $\rightarrow$  0.8 $\mu$ g  $\rightarrow$  8 $\mu$ g  $\rightarrow$  3x80 $\mu$ g). Cells were harvested two hours after peptide challenge *in vivo*. FACS staining of IL-10, c-Maf, NFIL-3, FoxP3, LAG-3, TIGIT, PD-1 and TIM-3 in CD4<sup>+</sup> T cells at the indicated stages of treatment. Scatter plots show the percentage of viable CD4<sup>+</sup> cells from individual mice which express the signature proteins, horizontal lines show means for each treatment group. Pooled results from two-three independent experiments.

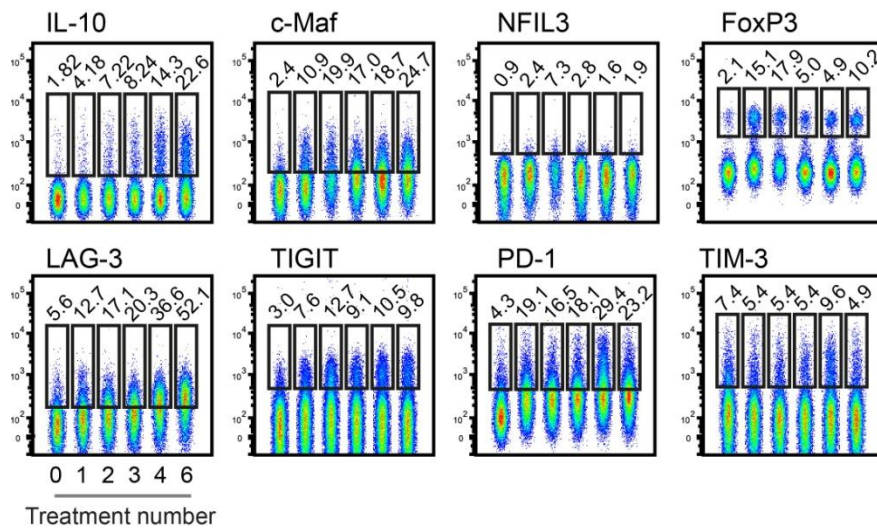

**Supplementary Fig. 4 CD4<sup>+</sup> T cell signature induced by dose escalation immunotherapy is maintained in resting cells.**

Tg4 mice were treated s.c. with an escalating dose of MBP Ac1-9[4Y] (0.08µg → 0.8µg → 8µg → 3x80µg). FACS staining of IL-10, c-Maf, NFIL-3, FoxP3, LAG-3, TIGIT, PD-1 and TIM-3 in CD4<sup>+</sup> T cells at the indicated stages of treatment. Resting cells were harvested two hours after PBS-challenge *in vivo*, 4 days after the indicated peptide treatment. Data are representative of two-three independent experiments.

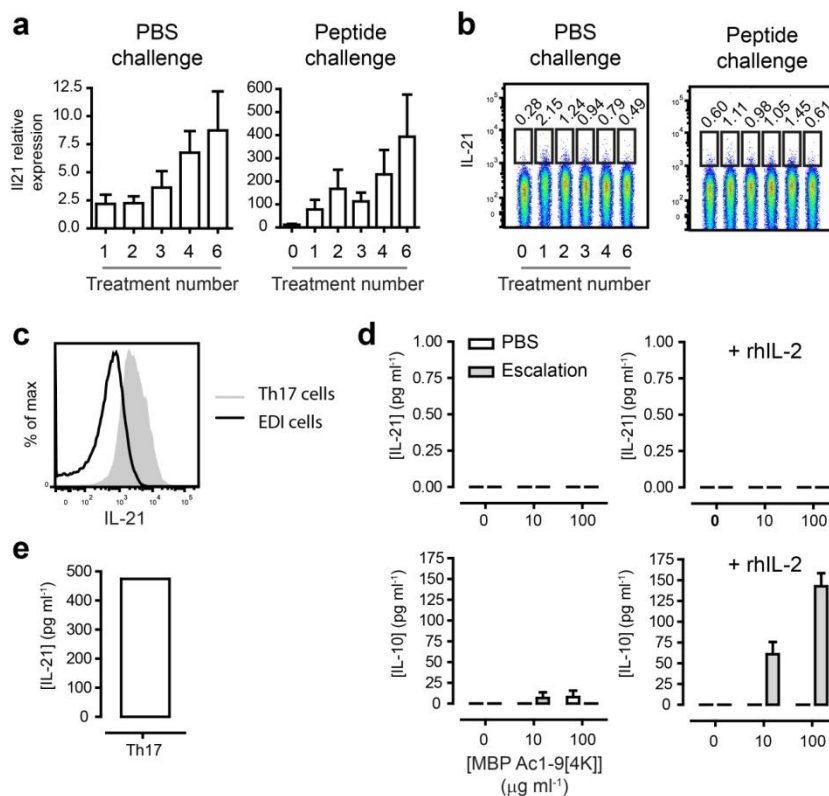

**Supplementary Fig. 5 IL-21 mRNA but not protein is produced by CD4<sup>+</sup> T cells during dose escalation immunotherapy.** Tg4 mice were treated s.c. with an escalating dose of MBP Ac1-9[4Y] (0.08µg → 0.8µg → 8µg → 3x80µg). (a) Quantitative RT-PCR analysis of *Il21* mRNA in CD4<sup>+</sup> T cells at the indicated stages of treatment. Graphs show mean expression values + SEM for three replicate experiments, pooled ( $n=3$  total). (b) IL-21 expression by CD4<sup>+</sup> T cells, detected by FACS at the indicated stages of treatment. (c) FACS-based comparison of IL-21 protein expression by CD4<sup>+</sup> T cells from EDI-treated mice (as above) versus Th17-polarised CD4<sup>+</sup> T cells as a positive control. Representative of three similar experiments (d) CD4<sup>+</sup> T cells from EDI- or PBS-treated mice were re-stimulated in the presence of irradiated APCs and a titration of MBP Ac1-9[4K]. Supernatant was collected after 72 hours to detect IL-21 and IL-10 levels by MFBI. Representative of three similar experiments, error bars show + SEM of at least two independent biological replicates, each assayed in duplicate. (e) IL-21 in the supernatant of Th17-polarised CD4<sup>+</sup> T cells, detected by MFBI (positive control). Representative of two experiments, assayed in duplicate.
